# Supplementary material for: Accuracy of the neurosurgeons estimation of extent of resection in glioblastoma
Source: Springer Nature journal article supplement (doi:10.1007/s00701-019-04089-8), 2019-10-28
Supplement: MOESM1 [file 17319120]

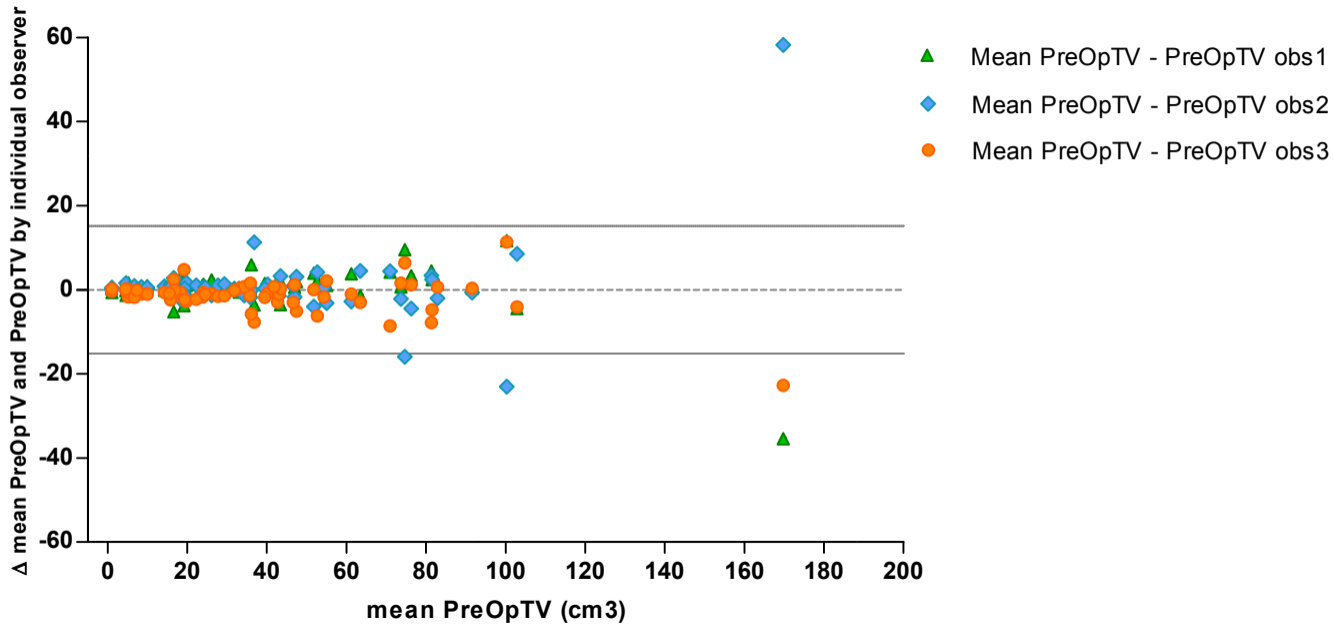

Figure 1.

Bland-Altman plot for three observers. Mean PreOpTV (x-axis) is plotted against mean PreOpTV minus the PreOpTV measured by the individual observer (y-axis). This graph displays per patient the agreement between the three observers. High agreement corresponds with the three colours being close together. The lines represent the limits of agreement. PreOpTV: pre-operative tumor volume. Obs1, measured by neurosurgeon. Obs2, measured by radiologist. Obs3, measured by student.



Figure 2.

Bland-Altman plot for three observers. Mean PostOpTV (x-axis) is plotted against mean PostOpTV minus the PostOpTV measured by the individual observer (y-axis). This graph displays per patient the agreement between the three observers. High agreement corresponds with the three colours being close together. The lines represent the limits of agreement. PostOpTV: post-operative tumor volume. Obs1, measured by neurosurgeon. Obs2, measured by radiologist. Obs3, measured by student.

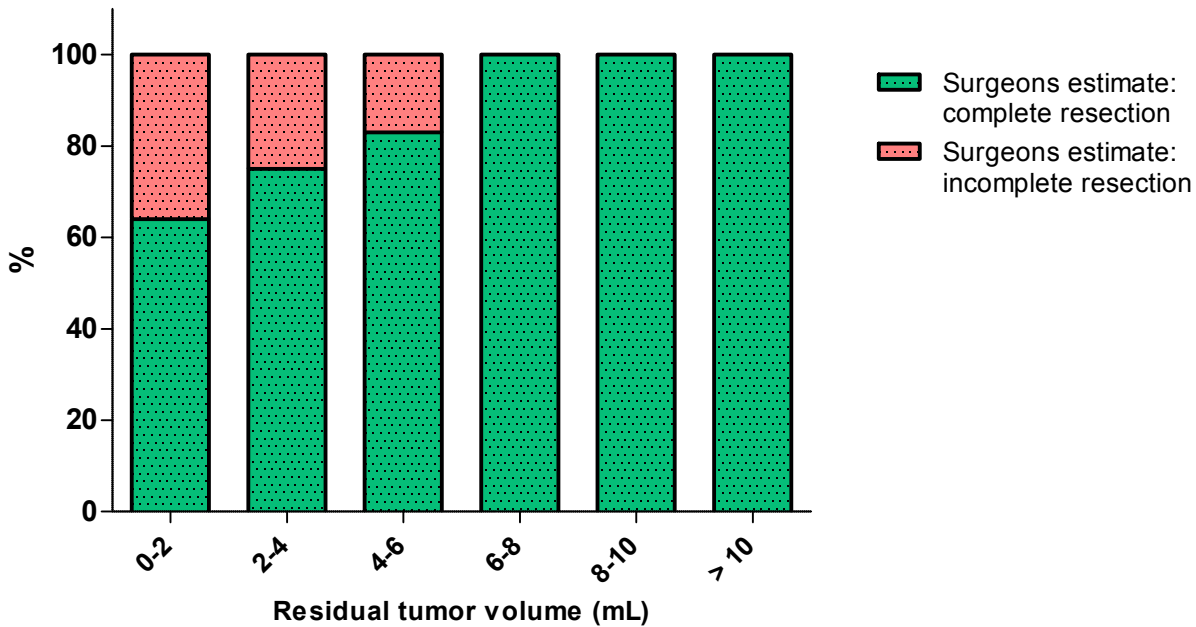

Figure 3.

Amount of residual tumor (x-axis) plotted against the distribution of surgeons estimation (y-axis). This graph shows estimation of the neurosurgeon to be 100% correct when residual volume is higher than 6 cm<sup>3</sup>.
